# Supplementary material
Source: publisher figshare collection journal article supplement (https://acs.figshare.com/ndownloader/files/4087315)
Supplement: Supplementary file 1 [file 4087315]

# Interfaces and Composition Profiles in Metal-Sulfide Nanolayers Synthesized by Atomic Layer Deposition

Elijah Thimsen<sup>\*1</sup>, Sergey V. Baryshev<sup>\*1</sup>, Alex B.F. Martinson<sup>1</sup>, Jeffrey W. Elam<sup>2</sup>, Igor V. Veryovkin<sup>1</sup>, Michael J. Pellin<sup>3</sup>

<sup>1</sup>Materials Science Division, Argonne National Laboratory, Argonne, Illinois 60439

<sup>2</sup>Energy Systems Division, Argonne National Laboratory, Argonne, Illinois 60439

<sup>3</sup>Physical Sciences and Engineering Directorate, Argonne National Laboratory, Argonne, Illinois 60439

CORRESPONDING AUTHORS: E.T. (elijah.thimsen@gmail.com); S.V.B (sergey.v.baryshev@gmail.com)

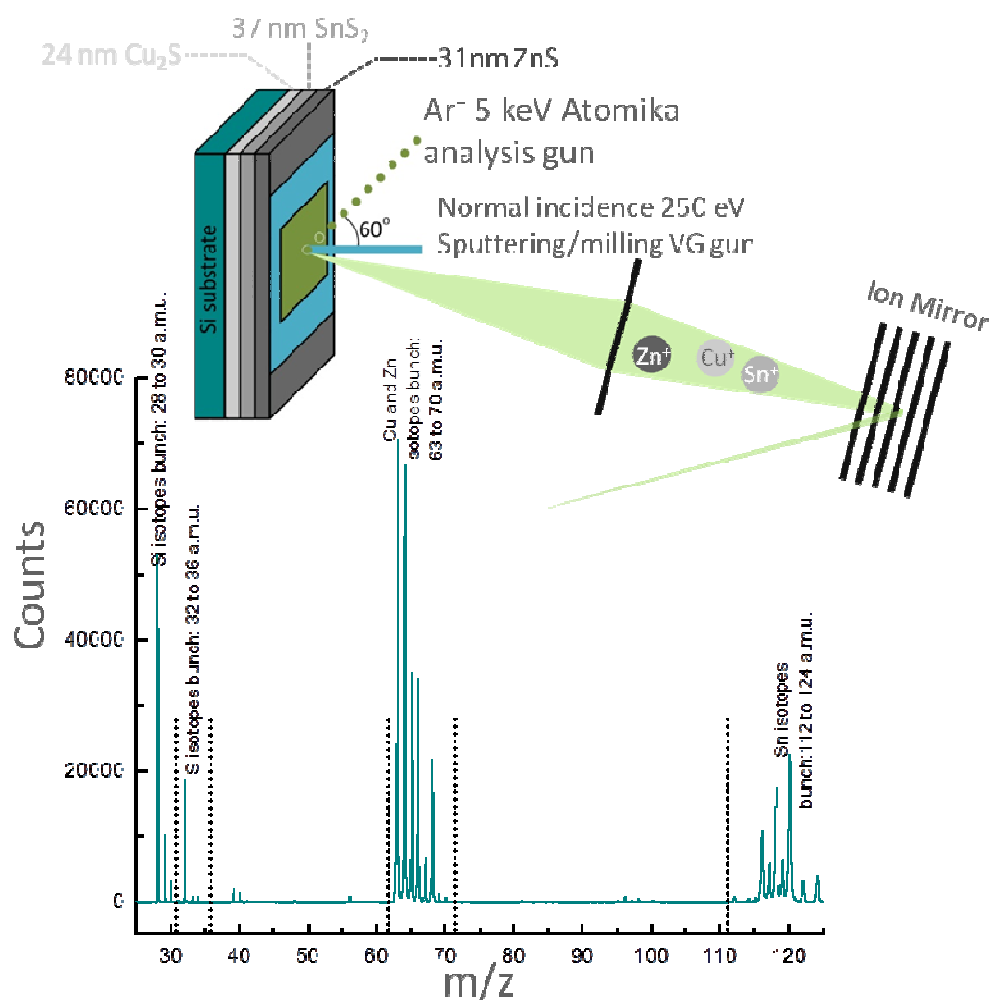

**Figure S1.** Schematic of the *gentleDB* TOF SIMS measurement (top) and sample mass spectrum (bottom).

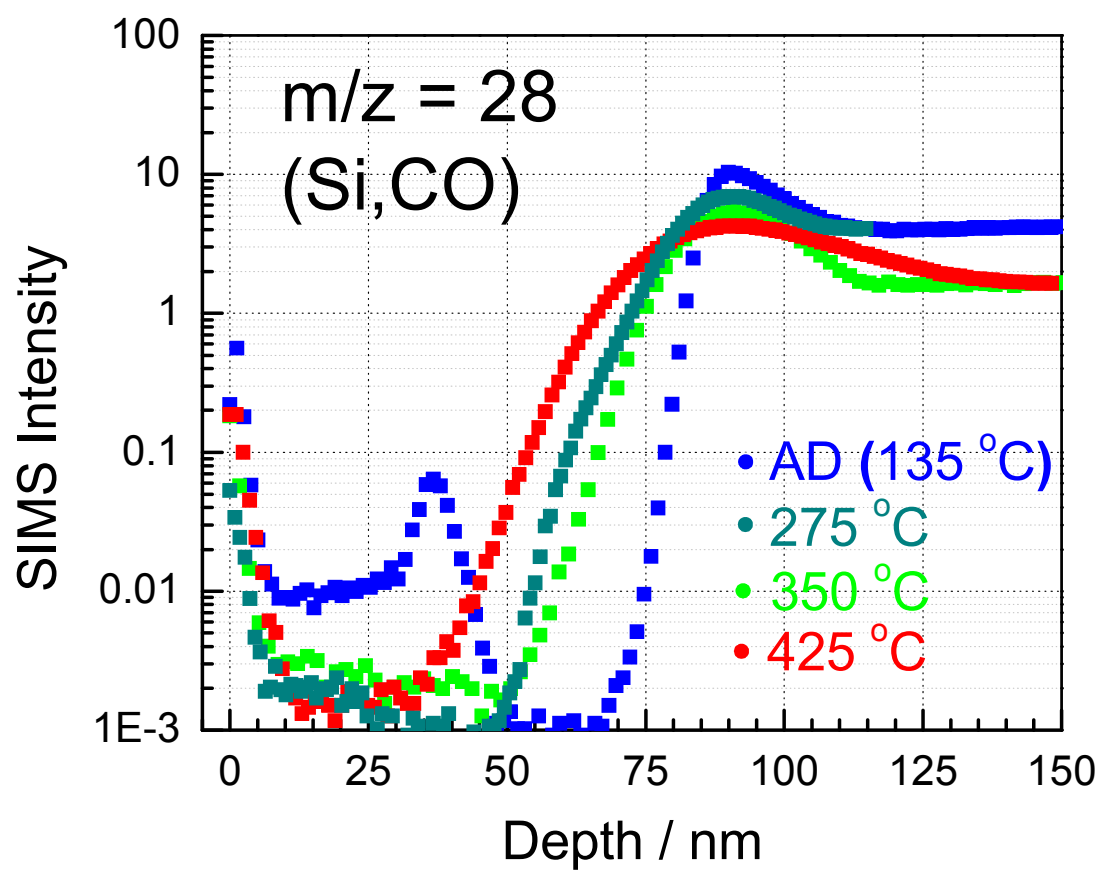

**Figure S2.** Depth profile of the  $m/z=+28$  peak which can be attributed to either Si or CO depending on the isotopic ratios. The peak in the AD profile at depths less than 50 nm did not have the isotopic ratio of Si and is therefore attributed to CO. The spike near depth=0 is also attributed to CO from atmospheric contaminants.

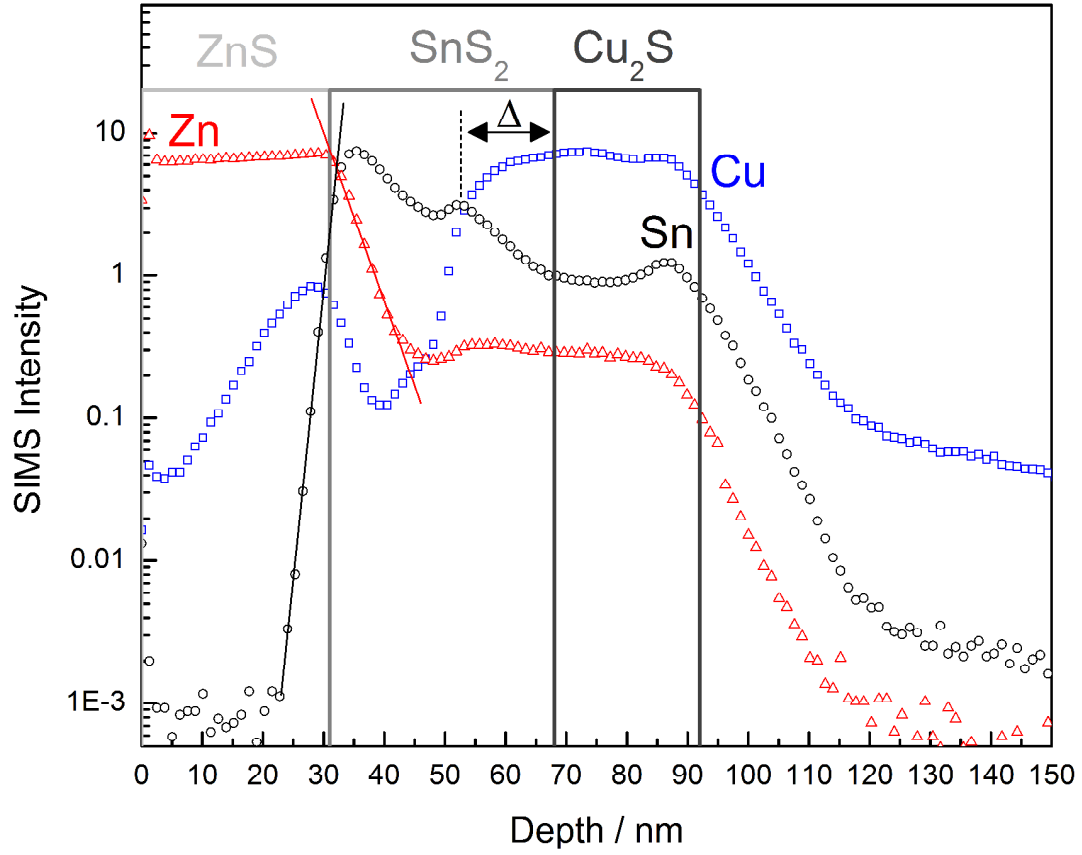

**Figure S3.** SIMS profile of the as-deposited multilayer and summary of the analysis used to determine the various values of  $L_D$  described in the main text. The solid red and black lines are exponential decays:  $\frac{I}{I_0} = e^{-(L_D^{-1} * d)}$  where  $d$  is the depth into the matrix,  $I$  is the intensity of the mobile species and  $I_0$  is the intensity of the mobile species at the interface.  $\Delta$  is the amount by which the  $\text{SnS}_2/\text{Cu}_2\text{S}$  interface moved.
